# Supplementary material for: Amine Functionalization Leads to Enhanced Performance for Nickel- and Cobalt-Ferrite-Supported Palladium Catalysts in Nitrobenzene Hydrogenation
Source: MDPI journal article supplement (doi:10.3390/ijms241713347), 2023-08-28
Supplement: s1 [file s1]

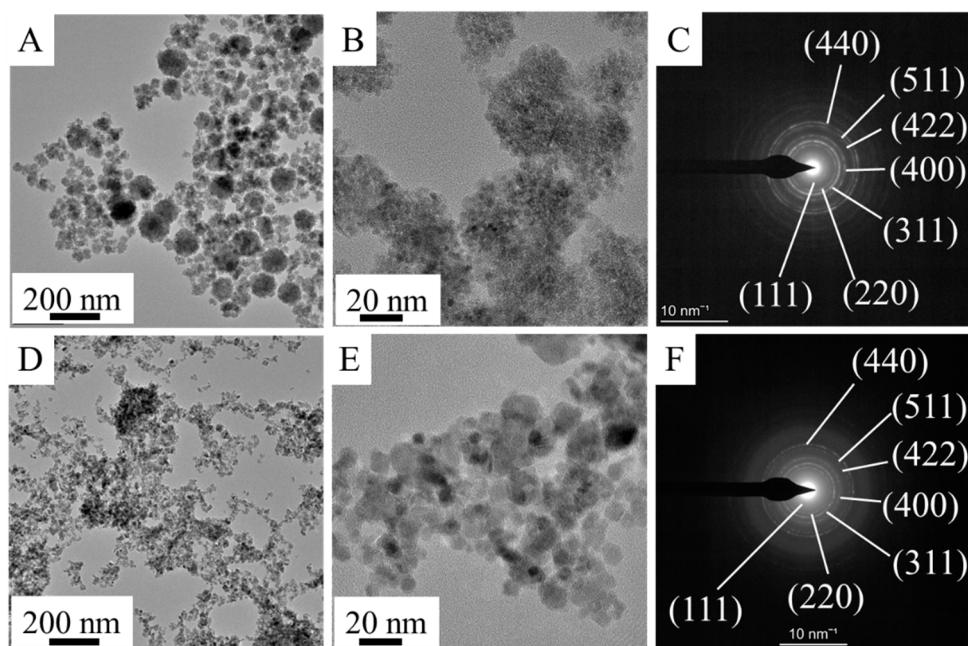

FigS1: HRTEM pictures and electron diffraction (SAED) of the amine-functionalized (A, B and C) and non-functionalized (D, E and F)  $\text{NiFe}_2\text{O}_4$  catalyst support

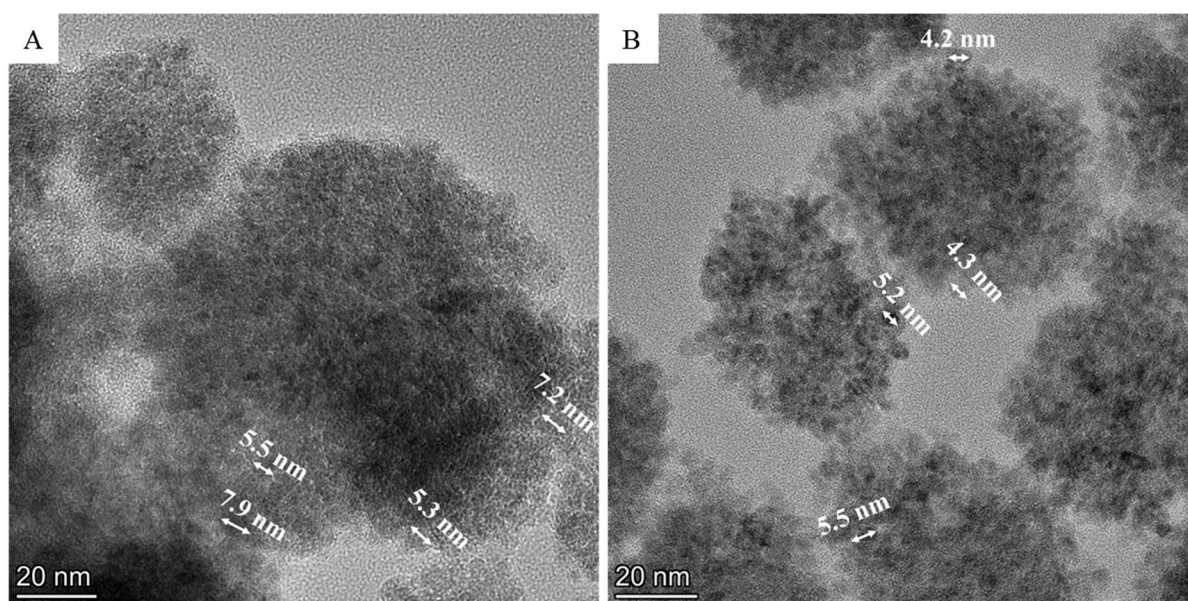

FigS2: HRTEM pictures of the  $\text{CoFe}_2\text{O}_4\text{-NH}_2$  (A) and  $\text{NiFe}_2\text{O}_4\text{-NH}_2$  (B) nanoparticles

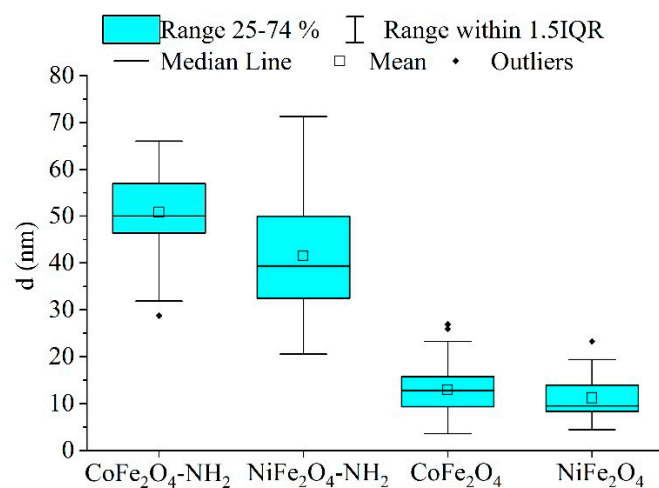

FigS3: Box-plot diagrams of the particle sizes of the ferrite catalyst supports

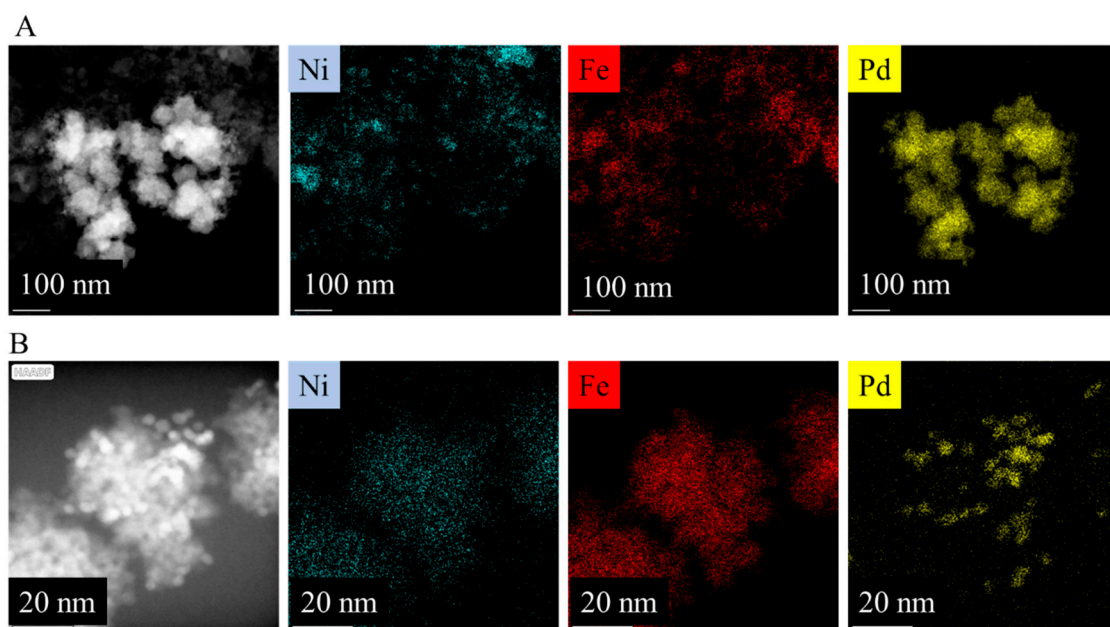

FigS4: Element mapping of the amine-functionalized (A) and the non-functionalized (B) Pd/NiFe<sub>2</sub>O<sub>4</sub> catalysts

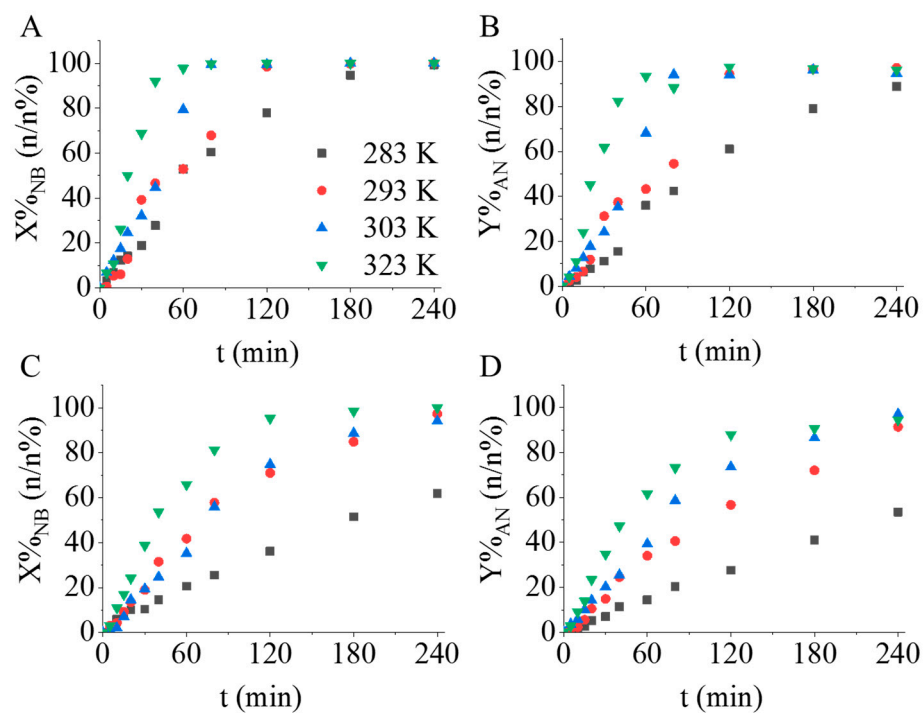

FigS5. Nitrobenzene conversions and aniline yields vs. time of hydrogenation at 283 K, 293 K 303 K and 323 K by using of Pd/NiFe<sub>2</sub>O<sub>4</sub> (A, B) Pd/NiFe<sub>2</sub>O<sub>4</sub>-NH<sub>2</sub> (C, D) catalysts.

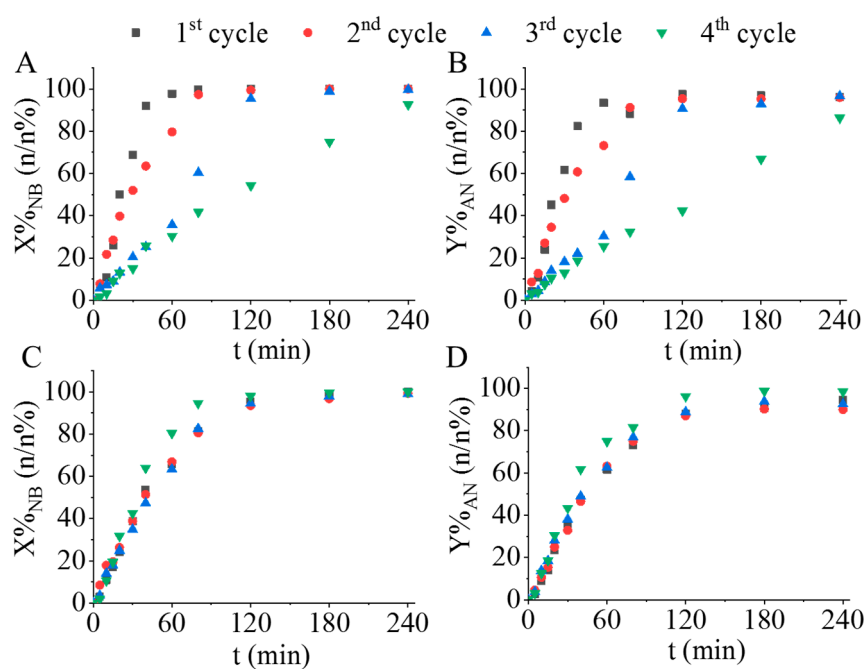

FigS6. Reuse tests of the catalysts. Nitrobenzene conversion and aniline yield vs time of hydrogenation by using Pd/NiFe<sub>2</sub>O<sub>4</sub> (C) and Pd/NiFe<sub>2</sub>O<sub>4</sub>-NH<sub>2</sub> (D) catalysts.
